# Supplementary material
Source: PubMed Central journal article supplement (PMC3957641)

TABLE S1. Bacteria used for *in silico* PCR.**Gram Negative**

|                                                |                                                       |
|------------------------------------------------|-------------------------------------------------------|
| <i>Escherichia fergusonii</i> ATCC 35469       | <i>Escherichia coli</i> UMN026                        |
| <i>Escherichia fergusonii</i> ECD-227          | <i>Escherichia coli</i> UMNK88                        |
| <i>Escherichia blattae</i> DSM 4481            | <i>Escherichia coli</i> UTI89                         |
| <i>Escherichia coli</i> 0127:H6 E2348/69       | <i>Escherichia coli</i> Xuzhou21                      |
| <i>Escherichia coli</i> 042                    | <i>Escherichia coli</i> str. K-12 substr. DH10B       |
| <i>Escherichia coli</i> 536                    | <i>Escherichia coli</i> str. K-12 substr. MG1655      |
| <i>Escherichia coli</i> 55989                  | <i>Escherichia coli</i> str. K-12 substr. W3110       |
| <i>Escherichia coli</i> ABU 83972              | <i>Escherichia coli</i> str. clone D i14              |
| <i>Escherichia coli</i> APEC O1                | <i>Escherichia coli</i> str. clone D i2               |
| <i>Escherichia coli</i> ATCC 8739              | <i>Acinetobacter baumannii</i> 1656-2 chromosome      |
| <i>Escherichia coli</i> B str. REL606          | <i>Acinetobacter baumannii</i> AB0057                 |
| <i>Escherichia coli</i> BL21(DE3)              | <i>Acinetobacter baumannii</i> AB307-0294             |
| <i>Escherichia coli</i> BL21(DE3)              | <i>Acinetobacter baumannii</i> ACICU                  |
| <i>Escherichia coli</i> BL21-Gold(DE3)pLysS AG | <i>Acinetobacter baumannii</i> ATCC 17978             |
| <i>Escherichia coli</i> BW2952                 | <i>Acinetobacter baumannii</i> AYE                    |
| <i>Escherichia coli</i> CFT073                 | <i>Acinetobacter baumannii</i> MDR-TJ                 |
| <i>Escherichia coli</i> DH1                    | <i>Acinetobacter baumannii</i> MDR-ZJ06               |
| <i>Escherichia coli</i> DH1                    | <i>Acinetobacter baumannii</i> SDF                    |
| <i>Escherichia coli</i> E24377A                | <i>Acinetobacter baumannii</i> TCDC-AB0715            |
| <i>Escherichia coli</i> ED1a                   | <i>Acinetobacter calcoaceticus</i> PHEA-2             |
| <i>Escherichia coli</i> ETEC H10407            | <i>Acinetobacter sp.</i> ADP1                         |
| <i>Escherichia coli</i> HS                     | <i>Acinetobacter sp.</i> DR1                          |
| <i>Escherichia coli</i> IAI1                   | <i>Aeromonas hydrophila</i> ATCC 7966                 |
| <i>Escherichia coli</i> IAI39                  | <i>Aeromonas salmonicida</i> A449                     |
| <i>Escherichia coli</i> IHE3034                | <i>Aeromonas veronii</i> B565                         |
| <i>Escherichia coli</i> K-12 substr. W3110     | <i>Burkholderia ambifaria</i> MC40-6 chromosome 1     |
| <i>Escherichia coli</i> KO11FL                 | <i>Burkholderia cenocepacia</i> AU 1054               |
| <i>Escherichia coli</i> KO11FL                 | <i>Burkholderia cenocepacia</i> HI2424                |
| <i>Escherichia coli</i> LF82                   | <i>Burkholderia cenocepacia</i> J2315                 |
| <i>Escherichia coli</i> NA114                  | <i>Burkholderia cenocepacia</i> MC0-3 chromosome 1    |
| <i>Escherichia coli</i> O103:H2 str. 12009     | <i>Burkholderia cepacia</i> AMMD chromosome 1         |
| <i>Escherichia coli</i> O111:H- str. 11128     | <i>Burkholderia cepacia</i> GG4                       |
| <i>Escherichia coli</i> O157:H7                | <i>Burkholderia gladioli</i> BSR3                     |
| <i>Escherichia coli</i> O157:H7 EDL933         | <i>Burkholderia glumae</i> BGR1                       |
| <i>Escherichia coli</i> O157:H7 str. EC4115    | <i>Burkholderia mallei</i> ATCC 23344                 |
| <i>Escherichia coli</i> O157:H7 str. TW14359   | <i>Burkholderia mallei</i> NCTC 10229                 |
| <i>Escherichia coli</i> O26:H11 str. 11368     | <i>Burkholderia mallei</i> NCTC 10247                 |
| <i>Escherichia coli</i> O55:H7 str. CB9615     | <i>Burkholderia mallei</i> SAVP1                      |
| <i>Escherichia coli</i> O55:H7 str. RM12579    | <i>Burkholderia multivorans</i> ATCC 17616 JGI        |
| <i>Escherichia coli</i> O7:K1 str. CE10        | <i>Burkholderia multivorans</i> ATCC 17616 Tohoku     |
| <i>Escherichia coli</i> O83:H1 str. NRG 857C   | <i>Burkholderia phymatum</i> STM815                   |
| <i>Escherichia coli</i> P12b                   | <i>Burkholderia phytofirmans</i> PsJN                 |
| <i>Escherichia coli</i> S88                    | <i>Burkholderia pseudomallei</i> 1026b                |
| <i>Escherichia coli</i> SE11                   | <i>Burkholderia pseudomallei</i> 1106a                |
| <i>Escherichia coli</i> SE15                   | <i>Burkholderia pseudomallei</i> 1710b                |
| <i>Escherichia coli</i> SMS-3-5                | <i>Burkholderia pseudomallei</i> 668                  |
| <i>Escherichia coli</i> UM146                  | <i>Burkholderia pseudomallei</i> K96243               |
|                                                | <i>Burkholderia pseudomallei</i> MSHR346 chromosome 1 |
|                                                | <i>Burkholderia rhizoxinica</i> HKI 454               |
|                                                | <i>Burkholderia sp.</i> 383 chromosome 1              |
|                                                | <i>Burkholderia sp.</i> CCGE1001                      |

*Burkholderia* sp. CCGE1002  
*Burkholderia* sp. CCGE1003  
*Burkholderia* sp. KJ006  
*Burkholderia* sp. YI23  
*Burkholderia thailandensis* E264  
*Burkholderia vietnamiensis* G4  
*Burkholderia xenovorans* LB400 chromosome 1  
*Citrobacter koseri* ATCC BAA-895  
*Citrobacter rodentium* ICC168  
*Enterobacter aerogenes* KCTC 2190  
*Enterobacter asburiae* LF7a  
*Enterobacter cloacae* EcWSU1  
*Enterobacter cloacae* SCF1  
*Enterobacter cloacae* subsp. Cloacae ATCC 13047  
*Enterobacter cloacae* subsp. Dissolvens SDM  
*Enterobacter sakazakii* ATCC BAA-894  
*Enterobacter* sp. 638  
*Haemophilus ducreyi* 35000HP  
*Haemophilus influenzae* 10810  
*Haemophilus influenzae* 86-028NP  
*Haemophilus influenzae* F3031  
*Haemophilus influenzae* F3047  
*Haemophilus influenzae* PittEE  
*Haemophilus influenzae* PittGG  
*Haemophilus influenzae* R2846  
*Haemophilus influenzae* R2866  
*Haemophilus influenzae* Rd  
*Haemophilus parainfluenzae* T3T1  
*Haemophilus parasuis* SH0165  
*Haemophilus somnus* 129PT  
*Haemophilus somnus* 2336  
*Klebsiella oxytoca* E718  
*Klebsiella oxytoca* KCTC 1686  
*Klebsiella pneumoniae* 342  
*Klebsiella pneumoniae* KCTC 2242  
*Klebsiella pneumoniae* NTUH-K2044  
*Klebsiella pneumoniae* HS11286  
*Klebsiella pneumoniae* MGH 78578  
*Klebsiella variicola* At-22  
*Legionella longbeachae* NSW150  
*Legionella pneumophila* 2300/99 Alcoy  
*Legionella pneumophila* str. Corby  
*Legionella pneumophila* str. Lens  
*Legionella pneumophila* str. Paris  
*Legionella pneumophila* ATCC 43290  
*Legionella pneumophila* NC\_018139  
*Legionella pneumophila* NC\_018140  
*Legionella pneumophila* str. Philadelphia 1  
*Moraxella catarrhalis* RH4  
*Neisseria gonorrhoeae* FA 1090  
*Neisseria gonorrhoeae* NCCP11945  
*Neisseria gonorrhoeae* TCDC-NG08107  
*Neisseria lactamica* 020-06  
*Neisseria meningitidis* 053442  
*Neisseria meningitidis* 8013  
*Neisseria meningitidis* FAM18  
*Neisseria meningitidis* G2136  
*Neisseria meningitidis* H44/76  
*Neisseria meningitidis* M01-240149  
*Neisseria meningitidis* M01-240355  
*Neisseria meningitidis* M04-240196  
*Neisseria meningitidis* NZ-05/33  
*Neisseria meningitidis* WUE 2594  
*Neisseria meningitidis* alpha14  
*Neisseria meningitidis* alpha710  
*Neisseria meningitidis* serogroup A strain Z2491  
*Neisseria meningitidis* serogroup B strain MC58  
*Pantoea ananatis* AJ13355  
*Pantoea ananatis* LMG 20103  
*Pantoea ananatis* LMG 5342  
*Pantoea ananatis* PA13  
*Pantoea* sp. At-9b  
*Pantoea vagans* C9-1  
*Pasteurella multocida*  
*Pasteurella multocida* 36950  
*Pasteurella multocida* subsp. Multocida str. 3480  
*Pasteurella multocida* subsp. Multocida str. HN06  
*Photobacterium luminescens*  
*Photobacterium luminescens*  
*Proteus mirabilis* HI4320  
*Providencia stuartii* MRSN 2154  
*Pseudomonas aeruginosa*  
*Pseudomonas aeruginosa* DK2  
*Pseudomonas aeruginosa* LESB58  
*Pseudomonas aeruginosa* M18  
*Pseudomonas aeruginosa* NCGM2.S1  
*Pseudomonas aeruginosa* PA7  
*Pseudomonas aeruginosa* UCBPP-PA14  
*Pseudomonas brassicacearum* NFM421  
*Pseudomonas entomophila* L48  
*Pseudomonas fluorescens* A506  
*Pseudomonas fluorescens* F113  
*Pseudomonas fluorescens* Pf-5  
*Pseudomonas fluorescens* PfO-1  
*Pseudomonas fluorescens* SBW25  
*Pseudomonas fulva* 12-X  
*Pseudomonas mendocina* NK-01  
*Pseudomonas mendocina* ymp  
*Pseudomonas putida* BIRD-1  
*Pseudomonas putida* DOT-T1E

*Pseudomonas putida* F1  
*Pseudomonas putida* GB-1  
*Pseudomonas putida* KT2440  
*Pseudomonas putida* ND6  
*Pseudomonas putida* S16  
*Pseudomonas putida* W619  
*Pseudomonas stutzeri* A1501  
*Pseudomonas stutzeri* ATCC 17588 = LMG 11199  
*Pseudomonas stutzeri* CCUG 29243  
*Pseudomonas stutzeri* DSM 10701  
*Pseudomonas stutzeri* DSM 4166  
*Pseudomonas syringae*  
*Pseudomonas syringae* pv. Phaseolicola 1448A  
*Salmonella bongori* NCTC 12419  
*Salmonella enterica* subsp. *arizonae* ser.62:z4,z23  
*Salmonella enterica* ser. Agona str. SL483  
*Salmonella enterica* ser. Choleraesuis str. SC-B67  
*Salmonella enterica* ser. Dublin str. CT\_02021853  
*Salmonella enterica* ser. Enteritidis str. P125109  
*Salmonella enterica* ser. Gallinarum str. 287/91  
*Salmonella enterica* ser. Gallinarum RKS5078  
*Salmonella enterica* ser. Heidelberg str. B182  
*Salmonella enterica* ser. Heidelberg str. SL476  
*Salmonella enterica* ser. Newport str. SL254  
*Salmonella enterica* ser. Paratyphi A str. AKU\_12601  
*Salmonella enterica* ser. Paratyphi A str. ATCC 9150  
*Salmonella enterica* ser. Paratyphi B str. SPB7  
*Salmonella enterica* ser. Paratyphi C strain RKS4594  
*Salmonella enterica* ser. Schwarzengrund CVM19633  
*Salmonella enterica* ser. Typhi  
*Salmonella enterica* ser. Typhi Ty2  
*Salmonella enterica* ser. Typhi str. P-stx-12  
*Salmonella enterica* ser. Typhimurium LT2  
*Salmonella enterica* ser. Typhimurium str. 14028S  
*Salmonella enterica* ser. Typhimurium str. 798  
*Salmonella enterica* ser. Typhimurium str. D23580  
*Salmonella enterica* ser. Typhimurium str. SL1344  
*Salmonella enterica* ser. Typhimurium str. ST4/74  
*Salmonella enterica* ser. Typhimurium str. T000240  
*Salmonella enterica* ser. Typhimurium str. UK-1  
*Serratia proteamaculans* 568  
*Serratia* sp. AS12  
*Serratia* sp. AS13  
*Serratia* sp. AS9  
*Serratia symbiotica* str. 'Cinara cedri'  
*Shigella boydii* CDC 3083-94  
*Shigella boydii* Sb227  
*Shigella dysenteriae* Sd197  
*Shigella flexneri* 2002017  
*Shigella flexneri* 2a str 301  
*Shigella flexneri* 2a str. 2457T  
*Shigella flexneri* 5 str. 8401  
*Shigella sonnei* 53G  
*Shigella sonnei* Ss046  
*Vibrio anguillarum* 775  
*Vibrio cholerae*  
*Vibrio cholerae* IEC224  
*Vibrio cholerae* LMA3984-4  
*Vibrio cholerae* M66-2  
*Vibrio cholerae* MJ-1236  
*Vibrio cholerae* O1 str. 2010EL-1786  
*Vibrio cholerae* O395  
*Vibrio cholerae* O395 chromosome 1  
*Vibrio fischeri* ES114  
*Vibrio fischeri* MJ11  
*Vibrio furnissii* NCTC 11218  
*Vibrio harveyi* ATCC BAA-1116  
*Vibrio parahaemolyticus* RIMD 2210633  
*Vibrio* sp. EJY3  
*Vibrio* sp. Ex25  
*Vibrio splendidus* LGP32  
*Vibrio vulnificus* CMCP6  
*Vibrio vulnificus* MO6-24/O  
*Vibrio vulnificus* YJ016  
*Pelobacter carbinolicus* DSM 2380  
*Pelobacter propionicus* DSM 2379  
*Shewanella amazonensis* SB2B  
*Shewanella baltica* BA175  
*Shewanella baltica* OS117  
*Shewanella baltica* OS155  
*Shewanella baltica* OS185  
*Shewanella baltica* OS195  
*Shewanella baltica* OS223  
*Shewanella baltica* OS678  
*Shewanella denitrificans* OS217  
*Shewanella frigidimarina* NCIMB 400  
*Shewanella halifaxensis* HAW-EB4  
*Shewanella loihica* PV-4  
*Shewanella oneidensis* MR-1  
*Shewanella pealeana* ATCC 700345  
*Shewanella piezotolerans* WP3  
*Shewanella putrefaciens* 200  
*Shewanella putrefaciens* CN-32  
*Shewanella sediminis* HAW-EB3  
*Shewanella* sp. ANA-3  
*Shewanella* sp. MR-4  
*Shewanella* sp. MR-7  
*Shewanella* sp. W3-18-1  
*Shewanella violacea* DSS12  
*Shewanella woodyi* ATCC 51908

**Gram Positive**

*Enterococcus faecalis* 62  
*Enterococcus faecalis* D32  
*Enterococcus faecalis* OG1RF  
*Enterococcus faecalis* V583  
*Enterococcus faecium* Aus0004  
*Enterococcus faecium* DO  
*Enterococcus hirae* ATCC 9790  
*Lactobacillus acidophilus* 30SC  
*Lactobacillus acidophilus* NCFM  
*Lactobacillus amylovorus* GRL 1112  
*Lactobacillus amylovorus* GRL1118  
*Lactobacillus brevis* ATCC 367  
*Lactobacillus buchneri* NRRL B-30929  
*Lactobacillus casei* ATCC 334  
*Lactobacillus casei* BD-II  
*Lactobacillus casei* BL23  
*Lactobacillus casei* LC2W  
*Lactobacillus casei* str. Zhang  
*Lactobacillus crispatus* ST1  
*Lactobacillus delbrueckii* subsp. bulgaricus 2038  
*Lactobacillus delbrueckii* ATCC 11842  
*Lactobacillus delbrueckii* ATCC BAA-365  
*Lactobacillus delbrueckii* subsp. bulgaricus ND02  
*Lactobacillus fermentum* CECT 5716  
*Lactobacillus fermentum* IFO 3956  
*Lactobacillus gasseri* ATCC 33323  
*Lactobacillus helveticus* DPC 4571  
*Lactobacillus helveticus* H10  
*Lactobacillus johnsonii* DPC 6026  
*Lactobacillus johnsonii* FI9785  
*Lactobacillus johnsonii* NCC 533  
*Lactobacillus kefiranofaciens* ZW3  
*Lactobacillus plantarum* JDM1  
*Lactobacillus plantarum* WCFS1  
*Lactobacillus plantarum* subsp. plantarum ST-III  
*Lactobacillus reuteri* DSM 20016  
*Lactobacillus reuteri* F275 Kitasato  
*Lactobacillus reuteri* SD2112  
*Lactobacillus rhamnosus* ATCC 8530  
*Lactobacillus rhamnosus* GG  
*Lactobacillus rhamnosus* GG  
*Lactobacillus rhamnosus* Lc 705  
*Lactobacillus ruminis* ATCC 27782  
*Lactobacillus sakei* subsp. sakei 23K  
*Lactobacillus salivarius* CECT 5713  
*Lactobacillus salivarius* subsp. salivarius UCC118  
*Lactobacillus sanfranciscensis* TMW 1.1304  
*Leifsonia xyli* subsp. xyli str. CTCB07  
*Listeria innocua* Clip11262  
*Listeria ivanovii* subsp. ivanovii PAM 55  
*Listeria monocytogenes* 07PF0776  
*Listeria monocytogenes* 08-5578  
*Listeria monocytogenes* 08-5923  
*Listeria monocytogenes* 10403S  
*Listeria monocytogenes* Clip81459  
*Listeria monocytogenes* FSL R2-561  
*Listeria monocytogenes* Finland 199  
*Listeria monocytogenes* HCC23  
*Listeria monocytogenes* J0161  
*Listeria monocytogenes* L99  
*Listeria monocytogenes* M7  
*Listeria monocytogenes* 4b F2365  
*Listeria monocytogenes* EGD  
*Listeria seeligeri* serovar 1/2b str. SLCC3954  
*Listeria welshimeri* serovar 6b str. SLCC5334  
*Micrococcus luteus* NCTC 2665  
*Staphylococcus aureus* 04-02981  
*Staphylococcus aureus* RF122  
*Staphylococcus aureus* Mu50  
*Staphylococcus aureus* 11819-97  
*Staphylococcus aureus* 71193  
*Staphylococcus aureus* COL  
*Staphylococcus aureus* ECT-R 2  
*Staphylococcus aureus* ED133  
*Staphylococcus aureus* ED98  
*Staphylococcus aureus* HO 5096 0412  
*Staphylococcus aureus* JH1  
*Staphylococcus aureus* JH9  
*Staphylococcus aureus* JKD6159  
*Staphylococcus aureus* LGA251  
*Staphylococcus aureus* M013  
*Staphylococcus aureus* MRSA252  
*Staphylococcus aureus* MSHR1132  
*Staphylococcus aureus* MSSA476  
*Staphylococcus aureus* MW2  
*Staphylococcus aureus* Mu3  
*Staphylococcus aureus* N315  
*Staphylococcus aureus* NCTC 8325  
*Staphylococcus aureus* S0385  
*Staphylococcus aureus* T0131  
*Staphylococcus aureus* TCH60  
*Staphylococcus aureus* TW20  
*Staphylococcus aureus* USA300\_FPR3757  
*Staphylococcus aureus* USA300\_TCH1516  
*Staphylococcus aureus* VC40  
*Staphylococcus aureus* JKD6008  
*Staphylococcus aureus* Newman  
*Staphylococcus carnosus* TM300

*Staphylococcus epidermidis* ATCC\_12228  
*Staphylococcus epidermidis* RP62A  
*Staphylococcus haemolyticus* JCSC1435  
*Staphylococcus lugdunensis* HKU09-01  
*Staphylococcus lugdunensis* N920143  
*Staphylococcus pseudintermedius* ED99  
*Staphylococcus pseudintermedius* HKU10-03  
*Staphylococcus saprophyticus* subsp. *Saprophyticus*  
*Streptococcus agalactiae* 2603V/R  
*Streptococcus agalactiae* A909  
*Streptococcus agalactiae* NEM316  
*Streptococcus dysgalactiae* ATCC 12394  
*Streptococcus dysgalactiae* GGS\_124 chromosome 1  
*Streptococcus equi* subsp. *equi* 4047  
*Streptococcus equi* subsp. *zooepidemicus*  
*Streptococcus equi* ATCC 35246  
*Streptococcus equi* MGCS10565  
*Streptococcus gallolyticus* UCN34  
*Streptococcus gallolyticus* ATCC 43143  
*Streptococcus gallolyticus* ATCC BAA-2069  
*Streptococcus gordonii* str. *Challis* substr. *CH1*  
*Streptococcus infantarius* subsp. *infantarius* CJ18  
*Streptococcus intermedius* JTH08  
*Streptococcus macedonicus* ACA-DC 198  
*Streptococcus mitis* B6  
*Streptococcus mutans* GS-5  
*Streptococcus mutans* LJ23  
*Streptococcus mutans* NN2025  
*Streptococcus mutans* UA159  
*Streptococcus oralis* Uo5  
*Streptococcus parasanguinis* ATCC 15912  
*Streptococcus parasanguinis* FW213  
*Streptococcus parauberis* KCTC 11537  
*Streptococcus pasteurianus* ATCC 43144  
*Streptococcus pneumoniae* 670-6B  
*Streptococcus pneumoniae* 70585  
*Streptococcus pneumoniae* AP200  
*Streptococcus pneumoniae* ATCC 700669  
*Streptococcus pneumoniae* CGSP14  
*Streptococcus pneumoniae* D39  
*Streptococcus pneumoniae* G54  
*Streptococcus pneumoniae* Hungary19A-6  
*Streptococcus pneumoniae* INV104  
*Streptococcus pneumoniae* INV200  
*Streptococcus pneumoniae* JJA  
*Streptococcus pneumoniae* OXC141  
*Streptococcus pneumoniae* P1031  
*Streptococcus pneumoniae* R6  
*Streptococcus pneumoniae* ST556  
*Streptococcus pneumoniae* TCH8431/19A  
*Streptococcus pneumoniae* TIGR4  
*Streptococcus pneumoniae* Taiwan19F-14  
*Streptococcus pseudopneumoniae* IS7493  
*Streptococcus pyogenes* Alab49  
*Streptococcus pyogenes* M1 GAS  
*Streptococcus pyogenes* MGAS10270  
*Streptococcus pyogenes* MGAS10394  
*Streptococcus pyogenes* MGAS10750  
*Streptococcus pyogenes* MGAS15252  
*Streptococcus pyogenes* MGAS1882  
*Streptococcus pyogenes* MGAS2096  
*Streptococcus pyogenes* MGAS315  
*Streptococcus pyogenes* MGAS5005  
*Streptococcus pyogenes* MGAS6180  
*Streptococcus pyogenes* MGAS9429  
*Streptococcus pyogenes* NZ131  
*Streptococcus pyogenes* SSI-1  
*Streptococcus pyogenes* str. *Manfredo*  
*Streptococcus pyogenes* strain MGAS8232  
*Streptococcus salivarius* 57.I  
*Streptococcus salivarius* CCHSS3  
*Streptococcus salivarius* JIM8777  
*Streptococcus sanguinis* SK36  
*Streptococcus suis* 05ZYH33  
*Streptococcus suis* 98HAH33  
*Streptococcus suis* A7  
*Streptococcus suis* BM407  
*Streptococcus suis* D12  
*Streptococcus suis* D9  
*Streptococcus suis* GZ1  
*Streptococcus suis* JS14  
*Streptococcus suis* P1/7  
*Streptococcus suis* SC84  
*Streptococcus suis* SS12  
*Streptococcus suis* ST1  
*Streptococcus suis* ST3  
*Streptococcus thermophilus* CNRZ1066  
*Streptococcus thermophilus* JIM 8232  
*Streptococcus thermophilus* LMD-9  
*Streptococcus thermophilus* LMG 18311  
*Streptococcus thermophilus* MN-ZLW-002  
*Streptococcus thermophilus* ND03  
*Streptococcus uberis* 0140J

**FIGURE S1.** Conventional duplex PCR using the Efer13 and EferYP primers performed on a variety of bacterial species. The 25 $\mu$ l final volume of the PCR mixture contained 0.4 $\mu$ M of dNTPs, 0.5  $\mu$ M of each primer, 15 $\mu$ l of molecular grade water, 2.5 $\mu$ l of ThermoPol Buffer 10X and 0.5 $\mu$ l of Taq DNA polymerase and half a colony of the bacterial strain tested. The cycling conditions were 94°C for 5min, followed by 37 cycles of 94°C for 30 sec, 56.5°C for 30 sec, 72°C for 30 sec, and then a final extension of 30 sec and hold at 4°C. Universal U165 primers (targeting 16S rDNA) were used as a control for the template DNA. The cycling conditions for the U165 primers were 94°C for 3 min, followed by 32 cycles of 94°C for 30 sec, 50°C for 1 min, 72°C for 1 min, and then a hold at 4°C. The PCR products were separated on a 1.2% Tris-acetate-EDTA buffer agarose electrophoresis gel stained using Gelred. The bands were referenced to a 100 bp and 1 kb DNA ladder to size the amplicons. Lane 1: 1kb ladder; 2: *Pseudomonas aeruginosa* Pa01; 3: *Pseudomonas aeruginosa* ATCC 27853; 4: *Escherichia fergusonii* ECD-227; 5: *Escherichia coli* Chi7122; 6: *Salmonella typhimurium* st002; 7: *Salmonella typhimurium* st004; 8: *Klebsiella oxytoca* ATCC 43165; 9: *Proteus vulgaris* ATCC 13351; 10: *Proteus mirabilis* Pm002; 11: *Proteus mirabilis* Pm001; 12: *Proteus mirabilis* Pm003; 13: *Proteus mirabilis* ATCC 25933; 14: *Proteus mirabilis* Pm004; 15: *Proteus mirabilis* Pm005; 16: 1kb ladder; 17: *Enterobacter cloacae* ent002; 18: *Enterobacter cloacae* ent003; 19: *Enterobacter cloacae* ent004; 20: *Micrococcus luteus* ATCC 12698; 21: *Pasteurella multocida* Pm016; 22: *Escherichia coli* Ec001; 23: *Escherichia coli* Ec002; 24: *Escherichia coli* Ec039; 25: *Escherichia coli* Ec048; 26: *Klebsiella pneumoniae* Kp001; 27: *Klebsiella pneumoniae* Kp004; 28: *Klebsiella pneumoniae* Kp005; 29: *Klebsiella pneumoniae* Kp006; 30: *Klebsiella pneumoniae* Kp007; 31: *Micrococcus luteus* ATCC 9341.

FIGURE S1

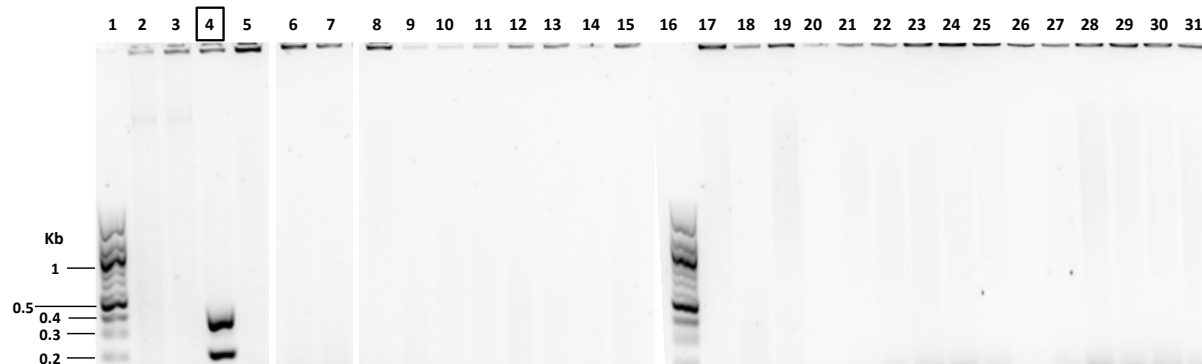

Supplement: AEM.04169-13_zam999105211so1.pdf [file AEM.04169-13_zam999105211so1.pdf]
